# Supplementary material
Source: PubMed Central journal article supplement (PMC4061462)

## SUPPLEMENTARY DATA

### **Hypochlorite-modification of sphingomyelin generates chlorinated lipid species that induce apoptosis and proteome alterations in dopaminergic PC12 neurons *in vitro***

Christoph Nussold<sup>1</sup>, Manfred Kollroser<sup>2</sup>, Harald Köfeler<sup>4</sup>, Gerald Rechberger<sup>5</sup>, Helga Reicher<sup>1</sup>, Andreas Üllen<sup>1</sup>, Eva Bernhart<sup>1</sup>, Sabine Waltl<sup>1</sup>, Ingrid Kratzer<sup>1</sup>, Albin Hermetter<sup>6</sup>, Hubert Hackl<sup>7</sup>, Zlatko Trajanoski<sup>7</sup>, Anđelko Hrzenjak<sup>3</sup>, Ernst Malle<sup>1</sup> and Wolfgang Sattler<sup>1</sup>

<sup>1</sup>Institute of Molecular Biology and Biochemistry, <sup>2</sup>Institute of Forensic Medicine, <sup>3</sup>Department of Pulmonology, and <sup>4</sup>Center of Medical Research, Medical University of Graz, Graz, Austria

<sup>5</sup>Institute of Molecular Biosciences, Karl-Franzens University, Graz, Austria

<sup>6</sup>Institute of Biochemistry, and <sup>7</sup>Institute for Genomics and Bioinformatics, Graz University of Technology, Graz, Austria

**Table I – Assignment of molecular ions produced by modification of SM(d18:1/16:0) by HOCl (added as reagent or generated enzymatically)**

| m/z   | SM species                                                  |
|-------|-------------------------------------------------------------|
| 703.6 | SM(d18:1/16:0)                                              |
| 705.6 | SM(d18:0/16:0) (impurity)                                   |
| 719.6 | SM(d18:1/16:0)epoxide                                       |
| 725.6 | SM(d18:1/16:0)Na <sup>+</sup>                               |
| 727.6 | SM(d18:0/16:0)Na <sup>+</sup>                               |
| 737.6 | (SM(d18:1/16:0)chloride)<br>or:<br>SM(d18:1/16:0)chloramide |
| 755.6 | SM(d18:1/16:0)chlorohydrin                                  |
| 759.6 | SM(d18:1/16:0)chlorohydrin-H <sub>2</sub> O+Na <sup>+</sup> |
| 771.6 | SM(d18:1/16:0)chlorohydrin chloramide-H <sub>2</sub> O      |
| 777.6 | SM(d18:1/16:0)chlorohydrin+Na <sup>+</sup>                  |
| 789.6 | SM(d18:1/16:0)chlorohydrin chloramide                       |
|       |                                                             |

**Tables II and III** - Information on accession numbers, protein name, spot number in the corresponding gel, number of acquired spectra, number of distinct peptides, MS score, % amino acid coverage, theoretical Mw and pI, experimental Mw and pI, and fold-regulation. Protein identifications are based on multiple peptide sequences with a minimum number of three distinct peptides and protein identification in at least two out of the three gels.

TABLE IIA: Upregulated proteins in response to SM

| Protein name                                                      | RefSeq/UniProt accession number | Spot                                                  | Spectra             | Distinct peptides | Distinct summed MS/MS search score | % AA coverage | MW theor. (Da) | MW exper. (Da) | pI theor. | pI exper. | Regulation control - SM (Cy2/Cy3) | Gel   |       |       |  |  |
|-------------------------------------------------------------------|---------------------------------|-------------------------------------------------------|---------------------|-------------------|------------------------------------|---------------|----------------|----------------|-----------|-----------|-----------------------------------|-------|-------|-------|--|--|
|                                                                   |                                 |                                                       |                     |                   |                                    |               |                |                |           |           |                                   | Gel 1 | Gel 2 | Gel 3 |  |  |
| leucine aminopeptidase 3                                          | NP_001011910 Q68FS4             | 859                                                   | 41                  | 10                | 148,65                             | 23            | 56150,4        | 63956          | 6,78      | 6,95      | 3,08                              |       |       |       |  |  |
|                                                                   |                                 | 1035                                                  | 108                 | 18                | 341,73                             | 44            | 56150,4        | 58930          | 6,78      | 6,75      | 2,3                               |       |       |       |  |  |
|                                                                   |                                 | 997                                                   | 134                 | 18                | 334,9                              | 44            | 56150,4        | 58020          | 6,78      | 6,9       | 2,41                              |       |       |       |  |  |
| PREDICTED: similar to Fascin, isoform 2                           | NP_001094276 B5DE1              | 859                                                   | 17                  | 9                 | 114,02                             | 17            | 54550,3        | 63956          | 6,44      | 6,95      | 3,08                              |       |       |       |  |  |
|                                                                   |                                 | 710                                                   | 12                  | 6                 | 92,13                              | 15            | 54550,3        | 71581          | 6,44      | 6,75      | 2,04                              |       |       |       |  |  |
|                                                                   |                                 | 1035                                                  | 88                  | 17                | 304,05                             | 40            | 54550,3        | 58930          | 6,44      | 6,75      | 2,3                               |       |       |       |  |  |
|                                                                   |                                 | 997                                                   | 131                 | 23                | 395,38                             | 52            | 54550,3        | 58020          | 6,44      | 6,9       | 2,41                              |       |       |       |  |  |
|                                                                   |                                 | aldehyde dehydrogenase family 3, member A1            | NP_114178 P11883    | 859               | 14                                 | 6             | 74,2           | 13             | 50338,9   | 63956     | 6,33                              | 6,95  | 3,08  |       |  |  |
|                                                                   |                                 |                                                       |                     | 1035              | 107                                | 15            | 270,5          | 29             | 50338,9   | 58930     | 6,33                              | 6,75  | 2,3   |       |  |  |
| 944                                                               | 58                              |                                                       |                     | 13                | 210,95                             | 38            | 50338,9        | 60793          | 6,33      | 6,9       | 2                                 |       |       |       |  |  |
|                                                                   |                                 | 997                                                   | 24                  | 7                 | 115,62                             | 13            | 50338,9        | 58020          | 6,33      | 6,9       | 2,41                              |       |       |       |  |  |
|                                                                   |                                 | proteasome (prosome, macropain) subunit, alpha type 1 | NP_058974 P18420    | 1873              | 17                                 | 6             | 77,37          | 24             | 29517,7   | 36654     | 6,14                              | 6,7   | 3,79  |       |  |  |
|                                                                   |                                 |                                                       |                     | 1983              | 178                                | 14            | 231,29         | 57             | 29517,7   | 32124     | 6,14                              | 6,55  | 2,38  |       |  |  |
| 1996                                                              | 89                              |                                                       |                     | 14                | 220,22                             | 58            | 29517,7        | 31383          | 6,14      | 6,75      | 2,29                              |       |       |       |  |  |
| superoxide dismutase 2                                            | NP_058747 P07895                | 2309                                                  | 39                  | 5                 | 84,93                              | 29            | 24683,2        | 25859          | 8,96      | 8,7       | 4,78                              |       |       |       |  |  |
|                                                                   |                                 | 2324                                                  | 11                  | 5                 | 81,41                              | 22            | 24683,2        | 25859          | 8,96      | 7,95      | 2,21                              |       |       |       |  |  |
|                                                                   |                                 | 2324                                                  | 87                  | 7                 | 122,4                              | 32            | 24683,2        | 22813          | 8,96      | 8,6       | 3,73                              |       |       |       |  |  |
|                                                                   |                                 | 2307                                                  | 62                  | 7                 | 110,97                             | 23            | 24683,2        | 23534          | 8,96      | 8,65      | 4,83                              |       |       |       |  |  |
|                                                                   |                                 | peroxiredoxin 1                                       | NP_476455 Q63716    | 2324              | 57                                 | 9             | 145,33         | 45             | 22109,5   | 25859     | 8,27                              | 7,95  | 2,21  |       |  |  |
|                                                                   |                                 |                                                       |                     | 2324              | 32                                 | 10            | 156,35         | 49             | 22109,5   | 22813     | 8,27                              | 8,6   | 3,73  |       |  |  |
| 2307                                                              | 4                               |                                                       |                     | 4                 | 55,49                              | 19            | 22109,5        | 23534          | 8,27      | 8,65      | 4,83                              |       |       |       |  |  |
| PREDICTED: similar to aldehyde dehydrogenase family 7, member A1  | NP_695212 Q64057                | 859                                                   | 10                  | 6                 | 73,19                              | 13            | 58749          | 63956          | 7,99      | 6,95      | 3,08                              |       |       |       |  |  |
|                                                                   |                                 | 1035                                                  | 12                  | 6                 | 100,17                             | 15            | 58749          | 58930          | 7,99      | 6,75      | 2,3                               |       |       |       |  |  |
| Glutathione transferase omega-1 (GSTO 1-1)                        | NP_001007603 Q9Z339             | 1873                                                  | 15                  | 6                 | 79,17                              | 23            | 27669,1        | 36654          | 6,25      | 6,7       | 3,79                              |       |       |       |  |  |
|                                                                   |                                 | 1983                                                  | 50                  | 9                 | 137,4                              | 40            | 27669,1        | 32124          | 6,25      | 6,55      | 2,38                              |       |       |       |  |  |
| acidic ribosomal phosphoprotein P0                                | NP_071797 P19945                | 1497                                                  | 16                  | 7                 | 104,94                             | 30            | 34215,7        | 45457          | 5,91      | 5,95      | 2,02                              |       |       |       |  |  |
|                                                                   |                                 | 1682                                                  | 14                  | 4                 | 72,25                              | 13            | 34215,7        | 40884          | 5,91      | 5,35      | 3,2                               |       |       |       |  |  |
| dihydrofolate reductase                                           | NP_569084 Q920D2                | 2339                                                  | 44                  | 8                 | 128,14                             | 45            | 21638,2        | 24733          | 6,77      | 7,45      | 2,4                               |       |       |       |  |  |
|                                                                   |                                 | 2354                                                  | 34                  | 8                 | 123                                | 42            | 21638,2        | 22636          | 6,77      | 7,55      | 2,04                              |       |       |       |  |  |
| lectin, galactose binding, soluble 1                              | NP_063969 P11762                | 2695                                                  | 91                  | 8                 | 139,31                             | 58            | 14856,9        | 13258          | 5,14      | 4,8       | 3,25                              |       |       |       |  |  |
|                                                                   |                                 | 2805                                                  | 127                 | 9                 | 151,26                             | 58            | 14856,9        | 11505          | 5,14      | 4,7       | 2,6                               |       |       |       |  |  |
| phosphoglycerate Kinase 1                                         | NP_445743 P16617                | 1211                                                  | 15                  | 6                 | 77,82                              | 15            | 44538,7        | 53124          | 8,02      | 8,4       | 2,93                              |       |       |       |  |  |
|                                                                   |                                 | 1215                                                  | 33                  | 9                 | 146,5                              | 26            | 44538,7        | 53124          | 8,02      | 8,25      | 2,9                               |       |       |       |  |  |
|                                                                   |                                 | 1217                                                  | 54                  | 13                | 182,16                             | 41            | 44538,7        | 53124          | 8,02      | 8,5       | 2,7                               |       |       |       |  |  |
|                                                                   |                                 | 1218                                                  | 14                  | 7                 | 86,5                               | 20            | 44538,7        | 53520          | 8,02      | 8,65      | 2,61                              |       |       |       |  |  |
|                                                                   |                                 | 1219                                                  | 181                 | 20                | 329,08                             | 80            | 44538,7        | 53520          | 8,02      | 8,7       | 2,86                              |       |       |       |  |  |
|                                                                   |                                 | 1232                                                  | 66                  | 12                | 174,64                             | 33            | 44538,7        | 53520          | 8,02      | 8,9       | 2,38                              |       |       |       |  |  |
|                                                                   |                                 | 1497                                                  | 69                  | 15                | 252,11                             | 52            | 44538,7        | 45457          | 8,02      | 5,95      | 2,02                              |       |       |       |  |  |
|                                                                   |                                 | 1646                                                  | 95                  | 17                | 299,66                             | 39            | 44538,7        | 40567          | 8,02      | 5,8       | 2,07                              |       |       |       |  |  |
|                                                                   |                                 | septin 6                                              | NP_001100678 B3GNI4 | 974               | 14                                 | 5             | 75,88          | 13             | 49782     | 62085     | 6,24                              | 7,2   | 2,36  |       |  |  |
| 1041                                                              | 79                              |                                                       |                     | 15                | 257,93                             | 43            | 49782          | 55807          | 6,24      | 7,05      | 3,66                              |       |       |       |  |  |
| eukaryotic translation initiation factor 4A1, isoform CRA_a       | NP_955404 Q6P3V8                | 1146                                                  | 16                  | 8                 | 132,63                             | 22            | 44607,4        | 55807          | 5,61      | 5,15      | 2,45                              |       |       |       |  |  |
|                                                                   |                                 | 1283                                                  | 38                  | 13                | 215,35                             | 35            | 44607,4        | 50439          | 5,61      | 5,3       | 2,89                              |       |       |       |  |  |
| Cathepsin D precursor                                             | NP_599161 P24268                | 1369                                                  | 47                  | 9                 | 159,52                             | 28            | 44681          | 48139          | 6,66      | 5,55      | 2,4                               |       |       |       |  |  |
|                                                                   |                                 | 1376                                                  | 35                  | 5                 | 80,59                              | 14            | 44681          | 48139          | 6,66      | 5,75      | 2,94                              |       |       |       |  |  |
|                                                                   |                                 | 1438                                                  | 47                  | 9                 | 157,51                             | 29            | 44681          | 45588          | 6,66      | 5,85      | 2,26                              |       |       |       |  |  |
| MYG1 protein                                                      | NP_001005545 Q641W2             | 1376                                                  | 19                  | 6                 | 105,97                             | 15            | 42889          | 48139          | 6,02      | 5,75      | 2,94                              |       |       |       |  |  |
|                                                                   |                                 | 1438                                                  | 41                  | 12                | 228,53                             | 38            | 42889          | 45588          | 6,02      | 5,85      | 2,26                              |       |       |       |  |  |
| PREDICTED: similar to transcriptional activator protein Pur-alpha | NP_001017503 Q68A21             | 1376                                                  | 6                   | 3                 | 41,95                              | 9             | 33018          | 48139          | 6,2       | 5,75      | 2,94                              |       |       |       |  |  |
|                                                                   |                                 | 1438                                                  | 7                   | 4                 | 56,79                              | 11            | 33018          | 45588          | 6,2       | 5,85      | 2,26                              |       |       |       |  |  |
| heterogeneous nuclear ribonucleoprotein C                         | NP_001020804 Q4V8K6             | 1821                                                  | 6                   | 3                 | 49,77                              | 12            | 32857,2        | 36952          | 4,86      | 4,55      | 5,47                              |       |       |       |  |  |

|                                                                        |                     |      |     |    |        |    |         |       |      |      |      |
|------------------------------------------------------------------------|---------------------|------|-----|----|--------|----|---------|-------|------|------|------|
|                                                                        |                     | 1902 | 20  | 6  | 98,68  | 22 | 32857,2 | 33658 | 4,86 | 4,6  | 2,85 |
| phosphatidylethanolamine binding protein                               | NP_058932<br>P31044 | 2285 | 61  | 7  | 123,81 | 39 | 20801,5 | 23717 | 5,47 | 7,15 | 4,7  |
|                                                                        |                     | 2366 | 82  | 10 | 169,74 | 53 | 20801,5 | 22286 | 5,47 | 5,3  | 3,04 |
| voltage dependent anion channel (Vdac1)                                | NP_112643<br>Q9Z2L0 | 1851 | 64  | 12 | 216,24 | 61 | 31966   | 35820 | 8,35 | 9,7  | 2,1  |
|                                                                        |                     | 1827 | 57  | 11 | 197,03 | 50 | 31966   | 36381 | 8,35 | 9,55 | 2,02 |
|                                                                        |                     | 1833 | 26  | 7  | 126,51 | 35 | 31966   | 36381 | 8,35 | 9,6  | 2,19 |
| tyrosine 3-monooxygenase/tryptophan 5-monooxygenase activation protein | NP_113791<br>P62260 | 1953 | 322 | 18 | 349,5  | 80 | 29121,9 | 33658 | 4,55 | 4,25 | 3,73 |
|                                                                        |                     | 2016 | 152 | 18 | 309,97 | 69 | 29121,9 | 30185 | 4,55 | 4,2  | 3,43 |
| Peroxiredoxin 2                                                        | NP_058865<br>P35704 | 2285 | 7   | 4  | 61,95  | 19 | 21797,8 | 23717 | 5,34 | 5,15 | 4,7  |
|                                                                        |                     | 2366 | 5   | 3  | 46,92  | 17 | 21797,8 | 22286 | 5,34 | 5,3  | 3,04 |

TABLE IIB: Downregulated proteins in response to SM

| Protein name                                                              | RefSeq/UniProt accession number | Spot   | Spectra | Distinct peptides | Distinct summed MS/MS search score | % AA coverage  | Gel            |           |           | Regulation control - SM (Cy2/Cy3) |       |
|---------------------------------------------------------------------------|---------------------------------|--------|---------|-------------------|------------------------------------|----------------|----------------|-----------|-----------|-----------------------------------|-------|
|                                                                           |                                 |        |         |                   |                                    |                | Gel 1          | Gel 2     | Gel 3     |                                   |       |
|                                                                           |                                 |        |         |                   |                                    | MW theor. (Da) | MW exper. (Da) | pl theor. | pl exper. |                                   |       |
| gamma-butyrobetaine,2-oxoglutarate dioxygenase                            | NP_742059 P54001                | 657    | 31      | 14                | 183,32                             | 30             | 60924,5        | 71488     | 5,7       | 5,9                               | -3.31 |
|                                                                           |                                 | 819    | 5       | 4                 | 55,57                              | 8              | 60924,5        | 65711     | 5,7       | 5,7                               | -2.18 |
|                                                                           |                                 | 770    | 84      | 15                | 259,52                             | 28             | 60924,5        | 66741     | 5,7       | 5,8                               | -2.99 |
| PREDICTED: similar to Alpha-enolase (NNE (Enolase 1))                     | NP_036686 P04764                | 1025   | 7       | 4                 | 51,11                              | 7              | 53924          | 58505     | 5,81      | 6,3                               | -2    |
|                                                                           |                                 | 1067   | 93      | 14                | 226,25                             | 38             | 53924          | 56794     | 5,81      | 6,8                               | -2.2  |
|                                                                           |                                 | 1237   | 19      | 6                 | 83,13                              | 18             | 53924          | 52731     | 5,81      | 6,25                              | -2.08 |
|                                                                           |                                 | 1105   | 351     | 22                | 402,48                             | 53             | 53924          | 57571     | 5,81      | 6,25                              | -2.31 |
|                                                                           |                                 | 1108   | 222     | 22                | 395,45                             | 49             | 53924          | 56243     | 5,81      | 6,05                              | -2.89 |
|                                                                           |                                 | 1113   | 113     | 19                | 333,56                             | 46             | 53924          | 56243     | 5,81      | 6,65                              | -2.21 |
|                                                                           |                                 | 1115   | 51      | 11                | 180,93                             | 20             | 53924          | 56243     | 5,81      | 6,5                               | -2.06 |
|                                                                           |                                 | 1122   | 310     | 20                | 361,67                             | 45             | 53924          | 56243     | 5,81      | 6,15                              | -2.83 |
|                                                                           |                                 | 1182   | 216     | 22                | 388,9                              | 53             | 53924          | 54520     | 5,81      | 6,6                               | -2.86 |
|                                                                           |                                 | 1197   | 320     | 23                | 425,03                             | 53             | 53924          | 54520     | 5,81      | 6,25                              | -3.17 |
|                                                                           |                                 | 1118   | 191     | 20                | 340,08                             | 46             | 53924          | 54946     | 5,81      | 6,8                               | -2.59 |
|                                                                           |                                 | 1149   | 134     | 19                | 332,31                             | 49             | 53924          | 54097     | 5,81      | 6,6                               | -2.61 |
|                                                                           |                                 | 1151   | 258     | 20                | 361,38                             | 52             | 53924          | 53262     | 5,81      | 6,5                               | -2.8  |
|                                                                           |                                 | 1153   | 211     | 21                | 379,23                             | 53             | 53924          | 53262     | 5,81      | 6,25                              | -2.52 |
|                                                                           |                                 | 1156   | 139     | 17                | 317,71                             | 39             | 53924          | 53262     | 5,81      | 6,15                              | -2.75 |
| 1222                                                                      | 104                             | 21     | 362,86  | 55                | 53924                              | 50439          | 5,81           | 6,5       | -2.47     |                                   |       |
| calreticulin                                                              | NP_071794 P18418                | 1042   | 12      | 5                 | 72,94                              | 14             | 47995,7        | 58506     | 4,33      | 3,8                               | -5.22 |
|                                                                           |                                 | 1110   | 6       | 3                 | 41,75                              | 7              | 47995,7        | 56682     | 4,33      | 4                                 | -2.01 |
|                                                                           |                                 | 1133   | 11      | 3                 | 43,09                              | 7              | 47995,7        | 55807     | 4,33      | 3,9                               | -3.08 |
| 1198                                                                      | 15                              | 3      | 52,09   | 8                 | 47995,7                            | 52034          | 4,33           | 3,8       | -6.29     |                                   |       |
| calumenin isoform a                                                       | NP_071980 Q3MID6                | 1126   | 45      | 13                | 180,61                             | 39             | 37063,9        | 55133     | 4,49      | 3,95                              | -3    |
|                                                                           |                                 | 1059   | 26      | 8                 | 135,37                             | 19             | 37063,9        | 58930     | 4,49      | 3,95                              | -3.28 |
|                                                                           |                                 | 1110   | 85      | 14                | 236,23                             | 42             | 37063,9        | 56682     | 4,49      | 4                                 | -2.01 |
|                                                                           |                                 | 1133   | 199     | 19                | 345,44                             | 48             | 37063,9        | 55807     | 4,49      | 3,9                               | -3.08 |
|                                                                           |                                 | 1183   | 144     | 18                | 345,34                             | 52             | 37063,9        | 52849     | 4,49      | 3,95                              | -3.75 |
| 1216                                                                      | 116                             | 18     | 335,94  | 55                | 37063,9                            | 51630          | 4,49           | 3,9       | -3.22     |                                   |       |
| 1238                                                                      | 50                              | 11     | 200,77  | 36                | 37063,9                            | 50049          | 4,49           | 4         | -3.31     |                                   |       |
| aldolase C                                                                | NP_036629 P09117                | 1382   | 6       | 4                 | 50,99                              | 14             | 39284          | 50061     | 6,67      | 7,25                              | -2.22 |
|                                                                           |                                 | 1500   | 8       | 4                 | 62,08                              | 12             | 39284          | 46303     | 6,67      | 7,5                               | -3.12 |
|                                                                           |                                 | 1425   | 82      | 13                | 241,73                             | 40             | 39284          | 46664     | 6,67      | 7,6                               | -2.45 |
| heterogeneous nuclear ribonucleoprotein A2/B1                             | NP_001098083 A7VCJ2             | 1668-2 | 40      | 12                | 163,06                             | 36             | 37477,9        | 41583     | 8,97      | 9,3                               | -3.02 |
|                                                                           |                                 | 1785   | 15      | 5                 | 80,97                              | 14             | 37477,9        | 37824     | 8,97      | 8,85                              | -4.86 |
|                                                                           |                                 | 1795   | 3       | 3                 | 51,36                              | 11             | 37477,9        | 37824     | 8,97      | 8,6                               | -4.17 |
|                                                                           |                                 | 1799   | 62      | 11                | 199,38                             | 39             | 37477,9        | 37824     | 8,97      | 9                                 | -2.95 |
| 1701                                                                      | 62                              | 15     | 229,19  | 46                | 37477,9                            | 39020          | 8,97           | 9,5       | -2.61     |                                   |       |
| triosephosphate isomerase 1                                               | NP_075211 P48500                | 2112   | 71      | 12                | 216,83                             | 58             | 31011,7        | 30901     | 5,56      | 7,35                              | -2.28 |
|                                                                           |                                 | 2115   | 31      | 8                 | 144,38                             | 38             | 31011,7        | 30446     | 5,56      | 7,15                              | -2.95 |
|                                                                           |                                 | 2120   | 107     | 12                | 209,32                             | 58             | 31011,7        | 29997     | 5,56      | 7,55                              | -7.45 |
|                                                                           |                                 | 2170   | 406     | 16                | 313,3                              | 70             | 31011,7        | 26653     | 5,56      | 7,55                              | -4    |
|                                                                           |                                 | 2153   | 193     | 13                | 248,7                              | 55             | 31011,7        | 27282     | 5,56      | 7,7                               | -5.67 |
| 2167                                                                      | 109                             | 10     | 195,53  | 41                | 31011,7                            | 27071          | 5,56           | 7,3       | -2.32     |                                   |       |
| Protein disulfide-isomerase precursor (Prolyl 4-hydroxylase subunit beta) | NP_037130 P04785                | 895    | 46      | 11                | 156,95                             | 22             | 56951,6        | 63013     | 4,82      | 4,6                               | -2.36 |
|                                                                           |                                 | 885    | 26      | 10                | 170,99                             | 20             | 56951,6        | 64195     | 4,82      | 4,4                               | -3.93 |
| dipeptidylpeptidase 7                                                     | NP_114179 Q9EPB1                | 895    | 6       | 3                 | 45,61                              | 6              | 55114,6        | 63013     | 4,86      | 4,6                               | -2.36 |
|                                                                           |                                 | 885    | 15      | 5                 | 90,99                              | 10             | 55114,6        | 64195     | 4,86      | 4,4                               | -3.93 |
| TAR DNA binding protein                                                   | NP_001011979 -                  | 1169   | 4       | 3                 | 42,43                              | 9              | 44518          | 53919     | 6,26      | 6,05                              | -2.85 |
|                                                                           |                                 | 1260   | 14      | 5                 | 59,04                              | 11             | 44518          | 53124     | 6,26      | 6,7                               | -2.15 |
|                                                                           |                                 | 1380   | 56      | 10                | 182,71                             | 24             | 44518          | 48139     | 6,26      | 6                                 | -2.24 |
| ERO1-like                                                                 | NP_612537 Q8R4A1                | 657    | 10      | 4                 | 60,9                               | 10             | 54115,8        | 71488     | 6,1       | 5,9                               | -3.31 |
|                                                                           |                                 | 819    | 50      | 13                | 222,51                             | 29             | 54115,8        | 65711     | 6,1       | 5,7                               | -2.18 |
| vimentin                                                                  | NP_112402 P31000                | 814    | 49      | 17                | 231,54                             | 38             | 53733          | 65883     | 5,06      | 5                                 | -2.49 |
|                                                                           |                                 | 895    | 51      | 13                | 201,59                             | 28             | 53733          | 63013     | 5,06      | 4,6                               | -2.36 |
|                                                                           |                                 | 885    | 6       | 3                 | 50,07                              | 6              | 53733          | 64195     | 5,06      | 4,4                               | -3.93 |
| lactate dehydrogenase A                                                   | NP_058721 P04642                | 1668   | 27      | 8                 | 107,02                             | 28             | 36450,7        | 41583     | 8,45      | 9,3                               | -3.02 |
|                                                                           |                                 | 1785   | 351     | 20                | 356,85                             | 65             | 36450,7        | 37824     | 8,45      | 8,85                              | -4.86 |
|                                                                           |                                 | 1795   | 162     | 13                | 223,53                             | 40             | 36450,7        | 37824     | 8,45      | 8,6                               | -4.17 |
|                                                                           |                                 | 1799   | 128     | 16                | 276,72                             | 51             | 36450,7        | 37824     | 8,45      | 9                                 | -2.95 |
| far upstream element (FUSE) binding protein 1                             | NP_001032742 Q32PX7             | 529    | 31      | 10                | 147,43                             | 20             | 67197,4        | 78730     | 7,18      | 7,45                              | -2.04 |
|                                                                           |                                 | 559    | 24      | 7                 | 101,19                             | 13             | 67197,4        | 76996     | 7,18      | 7,8                               | -2.27 |
|                                                                           |                                 | 624    | 102     | 17                | 306,64                             | 30             | 67197,4        | 74420     | 7,18      | 7,4                               | -2.05 |
| 636                                                                       | 152                             | 20     | 348,21  | 36                | 67197,4                            | 74420          | 7,18           | 7,7       | -2.01     |                                   |       |

|                                                                         |                        |          |                     |     |        |    |         |       |         |       |       |
|-------------------------------------------------------------------------|------------------------|----------|---------------------|-----|--------|----|---------|-------|---------|-------|-------|
| PREDICTED: similar to pyruvate kinase 3                                 | NP_445749<br>P11980    | 762      | 10                  | 4   | 50,77  | 7  | 57877,3 | 68883 | 7,57    | 8,05  | -3,17 |
|                                                                         |                        | 750      | 77                  | 14  | 235,25 | 35 | 57877,3 | 68883 | 7,57    | 7,7   | -3,67 |
|                                                                         |                        | 863      | 39                  | 11  | 171,98 | 25 | 57877,3 | 64912 | 7,57    | 7,35  | -2,47 |
|                                                                         |                        | 861      | 12                  | 6   | 75,1   | 13 | 57877,3 | 64912 | 7,57    | 7,2   | -2,72 |
|                                                                         |                        | 811      | 46                  | 15  | 251,36 | 32 | 57877,3 | 65201 | 7,57    | 7,65  | -2,52 |
|                                                                         |                        |          |                     |     |        |    |         |       |         |       |       |
|                                                                         |                        | 815      | 39                  | 11  | 167,5  | 24 | 57877,3 | 65201 | 7,57    | 7,75  | -2,56 |
|                                                                         |                        | 817      | 110                 | 19  | 351,75 | 41 | 57877,3 | 65201 | 7,57    | 7,85  | -2,93 |
| calumenin isoform b                                                     | NP_001029070<br>Q3MID6 | 1042     | 22                  | 8   | 119,4  | 27 | 37148   | 58506 | 4,43    | 3,8   | -5,22 |
|                                                                         |                        | 1198     | 120                 | 15  | 285,82 | 46 | 37148   | 52034 | 4,43    | 3,8   | -6,29 |
| tropomyosin 3, gamma isoform 2                                          | NP_001029242<br>Q63607 | 1889     | 33                  | 8   | 112,93 | 28 | 33280,8 | 36382 | 4,73    | 4,4   | -2,04 |
|                                                                         |                        | 1984     | 4                   | 3   | 33,93  | 10 | 33280,8 | 31383 | 4,73    | 4,25  | -2,32 |
| glutathione S-transferase, mu 2                                         | NP_803175<br>P08010    | 2173     | 53                  | 11  | 141,97 | 48 | 25702,8 | 29120 | 6,91    | 8,1   | -2,34 |
|                                                                         |                        | 2180     | 152                 | 20  | 364,39 | 78 | 25702,8 | 26653 | 6,91    | 8,1   | -2,44 |
| Adenosine kinase (Adenosine 5'-phosphotransferase)                      | NP_037027<br>Q64640    | 1169     | 19                  | 9   | 137,53 | 32 | 40133,9 | 53919 | 5,72    | 6,05  | -2,85 |
|                                                                         |                        | 1303     | 7                   | 4   | 61,2   | 14 | 40133,9 | 48894 | 5,72    | 6,1   | -2,36 |
| ErbB3-binding protein 1                                                 | NP_001004206<br>Q6AYD3 | 1169     | 7                   | 3   | 43,29  | 8  | 43657   | 53919 | 6,41    | 6,05  | -2,85 |
|                                                                         |                        | 1172     | 93                  | 16  | 284,02 | 42 | 43657   | 52440 | 6,41    | 6,8   | -2,48 |
|                                                                         |                        | 1222     | 10                  | 4   | 72,83  | 10 | 43657   | 50439 | 6,41    | 6,5   | -2,47 |
|                                                                         |                        | 1303     | 13                  | 5   | 81,45  | 12 | 43657   | 48894 | 6,41    | 6,1   | -2,36 |
| similar to Poi(yrC)-binding protein 1 (predicted)                       | NP_001013241<br>Q6AYU5 | 1382     | 41                  | 7   | 100,06 | 29 | 35512,7 | 50061 | 7,03    | 7,25  | -2,22 |
|                                                                         |                        | 1425     | 15                  | 5   | 80,5   | 20 | 35512,7 | 46664 | 7,03    | 7,6   | -2,45 |
| malate dehydrogenase, mitochondrial                                     | NP_112413<br>P04636    | 1668,2   | 3                   | 3   | 36,24  | 10 | 35683,8 | 41583 | 8,93    | 9,3   | -3,02 |
|                                                                         |                        | 1701     | 3                   | 3   | 39,88  | 10 | 35683,8 | 39020 | 8,93    | 9,5   | -2,61 |
| tumor protein D52                                                       | NP_001099891<br>-      | 2151     | 19                  | 7   | 101,04 | 34 | 24268,9 | 29555 | 4,68    | 4,6   | -5,28 |
|                                                                         |                        | 2213     | 46                  | 9   | 162,31 | 37 | 24268,9 | 25636 | 4,68    | 4,05  | -5,39 |
| procollagen-proline, 2-oxoglutarate 4-dioxygenase, alpha II polypeptide | NP_001101745<br>-      | 819      | 33                  | 8   | 141,83 | 16 | 60867,4 | 65711 | 5,69    | 5,7   | -2,18 |
|                                                                         |                        | 770      | 7                   | 3   | 48,61  | 6  | 60867,4 | 66741 | 5,69    | 5,8   | -2,99 |
| M2 pyruvate kinase                                                      | NP_445749<br>P11980    | 843      | 196                 | 26  | 503,44 | 55 | 57781,2 | 64696 | 7,15    | 7,4   | -2,2  |
|                                                                         |                        | 860      | 115                 | 15  | 261,82 | 27 | 57781,2 | 64696 | 7,15    | 7,3   | -2,86 |
|                                                                         |                        | 862      | 134                 | 23  | 426    | 52 | 57781,2 | 64696 | 7,15    | 7,85  | -3,47 |
|                                                                         |                        | 863      | 197                 | 24  | 456,1  | 49 | 57781,2 | 64696 | 7,15    | 7,45  | -2,91 |
|                                                                         |                        | 864      | 228                 | 25  | 479,42 | 51 | 57781,2 | 64696 | 7,15    | 7,7   | -2,43 |
|                                                                         |                        | 865      | 185                 | 22  | 423,66 | 45 | 57781,2 | 64696 | 7,15    | 7,75  | -2,61 |
|                                                                         |                        | 803      | 48                  | 13  | 198,16 | 31 | 57781,2 | 65201 | 7,15    | 7,6   | -2,96 |
|                                                                         |                        | 810      | 47                  | 16  | 284,42 | 37 | 57781,2 | 65201 | 7,15    | 7,45  | -3,25 |
|                                                                         |                        | 958      | 84                  | 18  | 327,71 | 41 | 57781,2 | 60332 | 7,15    | 7,15  | -2,34 |
|                                                                         |                        | 1090     | 67                  | 18  | 312,3  | 45 | 57781,2 | 55375 | 7,15    | 5,7   | -2,86 |
|                                                                         |                        | catalase | NP_036652<br>P04762 | 843 | 19     | 11 | 172,15  | 27    | 59757,5 | 64696 | 7,07  |
| 860                                                                     | 86                     |          |                     | 16  | 285,82 | 35 | 59757,5 | 64696 | 7,07    | 7,3   | -2,86 |
| 863                                                                     | 27                     |          |                     | 11  | 182,63 | 25 | 59757,5 | 64696 | 7,07    | 7,45  | -2,91 |
| 864                                                                     | 41                     |          |                     | 13  | 220,61 | 29 | 59757,5 | 64696 | 7,07    | 7,7   | -2,43 |
| 803                                                                     | 12                     |          |                     | 7   | 104,2  | 18 | 59757,5 | 65201 | 7,07    | 7,6   | -2,96 |
|                                                                         |                        | 810      | 7                   | 3   | 57,59  | 7  | 59757,5 | 65201 | 7,07    | 7,45  | -3,25 |
|                                                                         |                        | 811      | 19                  | 7   | 116,07 | 16 | 59757,5 | 65201 | 7,07    | 7,65  | -2,52 |
| actin, alpha 1, skeletal muscle, isoform CRA_a                          | NP_062085<br>P68136    | 1182     | 17                  | 3   | 53,58  | 8  | 51496,2 | 54520 | 5,91    | 6,6   | -2,86 |
|                                                                         |                        | 1153     | 5                   | 3   | 45,18  | 8  | 51496,2 | 53262 | 5,91    | 6,25  | -2,52 |
| heterogeneous nuclear ribonucleo-protein; type A/B hnRNP p40AIF-C1      | NP_112620<br>Q9QX81    | 1463     | 48                  | 7   | 132,84 | 23 | 36233   | 46664 | 6,48    | 6,7   | -2,02 |
|                                                                         |                        | 1453     | 91                  | 9   | 161,55 | 25 | 36233   | 45588 | 6,48    | 6,9   | -2,81 |
| poly(rC) binding protein 2                                              | NP_001013241<br>Q6AYU5 | 1463     | 18                  | 4   | 71,02  | 13 | 38580,3 | 46664 | 6,33    | 6,7   | -2,02 |
|                                                                         |                        | 1554     | 10                  | 3   | 53,7   | 9  | 38580,3 | 43509 | 6,33    | 6,6   | -2,15 |
|                                                                         |                        | 1453     | 22                  | 5   | 88,31  | 17 | 38580,3 | 45588 | 6,33    | 6,9   | -2,81 |
| calponin 3, acidic                                                      | NP_062232<br>P37397    | 1508     | 25                  | 8   | 138,73 | 29 | 36434,9 | 45588 | 5,47    | 5,25  | -3,12 |
|                                                                         |                        | 1535     | 11                  | 5   | 93,24  | 17 | 36434,9 | 42506 | 5,47    | 5,4   | -3,39 |
| Aspartate aminotransferase, cytoplasmic (Transaminase A)                | NP_036703<br>P13221    | 1500     | 36                  | 11  | 168,02 | 29 | 46429   | 46303 | 6,73    | 7,5   | -3,12 |
|                                                                         |                        | 1425     | 56                  | 14  | 239,8  | 40 | 46429   | 46664 | 6,73    | 7,6   | -2,45 |
| cathepsin B preproprotein                                               | NP_072119<br>Q6IN22    | 1508     | 14                  | 5   | 83,28  | 15 | 37544,4 | 45588 | 5,47    | 5,25  | -3,12 |
|                                                                         |                        | 1563     | 5                   | 3   | 49,89  | 11 | 37544,4 | 42506 | 5,47    | 5,5   | -2,07 |
| replication factor C (activator 1) 4                                    | NP_001099339<br>B4F778 | 1554     | 52                  | 13  | 222,79 | 38 | 39957,2 | 43509 | 6,21    | 6,6   | -2,15 |
|                                                                         |                        | 1564     | 17                  | 6   | 91,77  | 18 | 39957,2 | 41203 | 6,21    | 6,9   | -2,02 |
| annexin A1                                                              | NP_037036<br>P07150    | 1588     | 503                 | 25  | 434,78 | 71 | 38829,7 | 42506 | 6,96    | 7,1   | -2,1  |
|                                                                         |                        | 1625     | 62                  | 15  | 252,26 | 44 | 38829,7 | 41849 | 6,96    | 6,3   | -3,43 |
|                                                                         |                        | 1543     | 262                 | 26  | 443,52 | 72 | 38829,7 | 42506 | 6,96    | 7,25  | -2,09 |
|                                                                         |                        | 1564     | 42                  | 11  | 178,16 | 34 | 38829,7 | 41203 | 6,96    | 6,9   | -2,02 |
|                                                                         |                        | 1642     | 21                  | 7   | 114,46 | 22 | 38829,7 | 40567 | 6,96    | 6,15  | -2,81 |

|                                                               |                        |      |     |    |        |    |         |       |      |      |       |
|---------------------------------------------------------------|------------------------|------|-----|----|--------|----|---------|-------|------|------|-------|
| PREDICTED: similar to methionine adenosyltransferase II, beta | NP_001037747<br>Q5U2R0 | 1588 | 19  | 6  | 109,42 | 24 | 37374,9 | 42506 | 6,46 | 7,1  | -2,1  |
|                                                               |                        | 1543 | 5   | 3  | 56,68  | 14 | 37374,9 | 42506 | 6,46 | 7,25 | -2,09 |
| lactate dehydrogenase B                                       | NP_036727<br>P42123    | 1640 | 8   | 3  | 54,87  | 12 | 36612,6 | 41203 | 5,7  | 5,8  | -2,05 |
|                                                               |                        | 1728 | 10  | 4  | 57,09  | 9  | 36612,6 | 38120 | 5,7  | 5,6  | -2,73 |
| pyrroline-5-carboxylate reductase 1                           | NP_001099327<br>B2RYR3 | 1906 | 42  | 8  | 143,32 | 27 | 32226,5 | 34186 | 6,36 | 6,8  | -2,14 |
|                                                               |                        | 1892 | 82  | 15 | 281,6  | 54 | 32226,5 | 34186 | 6,36 | 7,05 | -2,72 |
| galectin 3                                                    | NP_114020<br>P08699    | 2031 | 25  | 4  | 71,88  | 16 | 27229,7 | 30659 | 8,92 | 9,4  | -2,09 |
|                                                               |                        | 2002 | 23  | 8  | 128,67 | 35 | 27229,7 | 31383 | 8,92 | 9,3  | -2,02 |
| phosphoglycerate mutase type B subunit                        | NP_445742<br>P25113    | 2116 | 95  | 13 | 243,66 | 63 | 28846,2 | 27926 | 7,07 | 7,15 | -2,96 |
|                                                               |                        | 2119 | 207 | 15 | 295,67 | 65 | 28846,2 | 27926 | 7,07 | 7,05 | -2,61 |
|                                                               |                        | 2102 | 41  | 7  | 126,74 | 37 | 28846,2 | 28809 | 7,07 | 7,3  | -2,72 |
|                                                               |                        | 2106 | 179 | 12 | 231,21 | 52 | 28846,2 | 28364 | 7,07 | 7,25 | -2,36 |
| phosphomannomutase 2                                          | NP_001100443<br>B5DF46 | 2116 | 84  | 9  | 153,72 | 39 | 27708,9 | 27926 | 6,9  | 7,15 | -2,96 |
|                                                               |                        | 2102 | 37  | 10 | 165,77 | 44 | 27708,9 | 28809 | 6,9  | 7,3  | -2,72 |
| enoyl Coenzyme A hydratase, short chain, 1, mitochondrial     | NP_511178<br>P14604    | 2116 | 6   | 3  | 53,88  | 16 | 31516,6 | 27926 | 8,4  | 7,15 | -2,96 |
|                                                               |                        | 2119 | 57  | 8  | 144,85 | 34 | 31516,6 | 27926 | 8,4  | 7,05 | -2,61 |
|                                                               |                        | 2106 | 83  | 10 | 176,71 | 38 | 31516,6 | 28364 | 8,4  | 7,25 | -2,36 |
| Ppib protein                                                  | NP_071981<br>P24368    | 2487 | 57  | 11 | 190,42 | 46 | 23802,7 | 17375 | 9,5  | 8,75 | -2,17 |
|                                                               |                        | 2485 | 32  | 9  | 154,3  | 43 | 23802,7 | 18635 | 9,5  | 8,8  | -2,23 |
| transaldolase                                                 | NP_113999<br>Q9EQS0    | 1583 | 56  | 11 | 202,91 | 31 | 37476,3 | 42838 | 6,57 | 6    | -3,07 |
|                                                               |                        | 1625 | 66  | 14 | 255,69 | 37 | 37476,3 | 41849 | 6,57 | 6,3  | -3,43 |
|                                                               |                        | 1640 | 30  | 7  | 116,78 | 21 | 37476,3 | 41203 | 6,57 | 5,8  | -2,05 |
|                                                               |                        | 1642 | 36  | 12 | 201,57 | 32 | 37476,3 | 40567 | 6,57 | 6,15 | -2,81 |
| cofilin 1                                                     | NP_058843<br>P45592    | 2487 | 11  | 2  | 39,75  | 15 | 18532,6 | 17375 | 8,22 | 8,75 | -2,17 |
|                                                               |                        | 2485 | 11  | 3  | 58,15  | 27 | 18532,6 | 18635 | 8,22 | 8,8  | -2,23 |



TABLE IIIA: Upregulated proteins in response to HOCl-SM

| Protein name                                          | RefSeq/UniProt accession number | Spot | Spectra | Distinct peptides | Distinct summed MS/MS search score | % AA coverage | MW theor. (Da) | MW exper. (Da) | pI theor. | pI exper. | Regulation control - HOCl-SM (Cy2/Cy5) | Gel   |       |       |
|-------------------------------------------------------|---------------------------------|------|---------|-------------------|------------------------------------|---------------|----------------|----------------|-----------|-----------|----------------------------------------|-------|-------|-------|
|                                                       |                                 |      |         |                   |                                    |               |                |                |           |           |                                        | Gel 1 | Gel 2 | Gel 3 |
| voltage dependent anion channel (Vdac1)               | Q9Z2L0<br>NP_112643             | 1829 | 25      | 9                 | 120,82                             | 38            | 31966          | 37479          | 8,35      | 9,45      | 2,54                                   |       |       |       |
|                                                       |                                 | 1835 | 81      | 11                | 178,52                             | 51            | 31966          | 37479          | 8,35      | 9,6       | 2,61                                   |       |       |       |
|                                                       |                                 | 1851 | 64      | 12                | 216,24                             | 61            | 31966          | 35820          | 8,35      | 9,7       | 2,97                                   |       |       |       |
|                                                       |                                 | 1855 | 83      | 12                | 209,38                             | 54            | 31966          | 35820          | 8,35      | 9,55      | 2,59                                   |       |       |       |
|                                                       |                                 | 1822 | 21      | 6                 | 101,37                             | 24            | 31966          | 36381          | 8,35      | 9,15      | 2,91                                   |       |       |       |
|                                                       |                                 | 1827 | 57      | 11                | 197,03                             | 50            | 31966          | 36381          | 8,35      | 9,55      | 2,67                                   |       |       |       |
|                                                       |                                 | 1833 | 26      | 7                 | 126,51                             | 35            | 31966          | 36381          | 8,35      | 9,6       | 2,85                                   |       |       |       |
| calcylin binding protein                              | Q6AYK6<br>NP_001004208          | 2043 | 19      | 5                 | 60,1                               | 20            | 26541,3        | 32070          | 7,64      | 7,9       | 2,96                                   |       |       |       |
|                                                       |                                 | 2095 | 113     | 13                | 224,51                             | 41            | 26541,3        | 28586          | 7,64      | 7,8       | 3,93                                   |       |       |       |
|                                                       |                                 | 2065 | 5       | 3                 | 32,28                              | 8             | 26541,3        | 29489          | 7,64      | 6,95      | 3,7                                    |       |       |       |
| adenylate kinase 2 isoform a                          | NP_112248<br>P29410             | 2043 | 29      | 7                 | 101,9                              | 29            | 26392,7        | 32070          | 7,01      | 7,9       | 2,96                                   |       |       |       |
|                                                       |                                 | 2095 | 72      | 9                 | 151                                | 43            | 26392,7        | 28586          | 7,01      | 7,8       | 3,93                                   |       |       |       |
| proteasome (prosome, macropain) subunit, alpha type 4 | NP_058977<br>P21670             | 2031 | 9       | 3                 | 39,44                              | 13            | 29498          | 31832          | 7,58      | 8,1       | 3,74                                   |       |       |       |
|                                                       |                                 | 2039 | 17      | 5                 | 66,87                              | 18            | 29498          | 29719          | 7,58      | 8,1       | 3,65                                   |       |       |       |
| expressed in non-metastatic cells 1, protein (NM23A)  | NP_612557<br>Q05982             | 2566 | 48      | 10                | 164,21                             | 67            | 17192,8        | 17320          | 5,96      | 5,95      | 7                                      |       |       |       |
|                                                       |                                 | 2605 | 16      | 6                 | 90,61                              | 46            | 17192,8        | 15223          | 5,96      | 6         | 6,12                                   |       |       |       |
| heterogeneous nuclear ribonucleoprotein C             | NP_001020804<br>Q4V8K6          | 1821 | 6       | 3                 | 49,77                              | 12            | 32857,2        | 36952          | 4,86      | 4,55      | 2,44                                   |       |       |       |
|                                                       |                                 | 1902 | 20      | 6                 | 98,68                              | 22            | 32857,2        | 33658          | 4,86      | 4,6       | 2,11                                   |       |       |       |
| L-3-hydroxyacyl-Coenzyme A dehydrogenase              | NP_476534<br>Q9WVK7             | 1855 | 12      | 5                 | 82,59                              | 14            | 34448          | 35820          | 8,83      | 9,55      | 2,59                                   |       |       |       |
|                                                       |                                 | 1822 | 13      | 4                 | 63,01                              | 11            | 34448          | 36381          | 8,83      | 9,15      | 2,91                                   |       |       |       |
|                                                       |                                 | 1827 | 31      | 6                 | 106,46                             | 14            | 34448          | 36381          | 8,83      | 9,55      | 2,67                                   |       |       |       |
| PREDICTED: similar to calmodulin 1                    | NP_114175<br>P62161             | 2443 | 12      | 2                 | 32,16                              | 20            | 14440,4        | 19678          | 4,36      | 3,15      | 5,07                                   |       |       |       |
|                                                       |                                 | 2475 | 11      | 2                 | 36,79                              | 20            | 14440,4        | 18781          | 4,36      | 3,4       | 6,22                                   |       |       |       |
|                                                       |                                 | 2502 | 13      | 2                 | 35,83                              | 20            | 14440,4        | 17241          | 4,36      | 3,4       | 2,24                                   |       |       |       |
|                                                       |                                 | 2535 | 14      | 3                 | 52,49                              | 21            | 14440,4        | 17241          | 4,36      | 3,15      | 4,73                                   |       |       |       |
| Heat shock protein beta-1 (HSP 27)                    | NP_114176<br>P42930             | 2151 | 363     | 13                | 220,57                             | 57            | 22892,8        | 27282          | 6,12      | 5,75      | 2,37                                   |       |       |       |
|                                                       |                                 | 2193 | 85      | 11                | 188,31                             | 51            | 22892,8        | 26038          | 6,12      | 5,3       | 2,11                                   |       |       |       |
|                                                       |                                 | 2264 | 17      | 4                 | 50,16                              | 17            | 22892,8        | 24277          | 6,12      | 5,5       | 2,05                                   |       |       |       |

TABLE IIIB: Downregulated proteins in response to HOCl-SM

| Protein name                                               | RefSeq/UniProt accession number | Spot | Spectra | Distinct peptides | Distinct summed MS/MS search score | % AA coverage | MW theor. (Da) | MW exper. (Da) | Gel 1     |           | Gel 2     |           | Regulation control - HOCl-SM (Cy2/Cy5) |
|------------------------------------------------------------|---------------------------------|------|---------|-------------------|------------------------------------|---------------|----------------|----------------|-----------|-----------|-----------|-----------|----------------------------------------|
|                                                            |                                 |      |         |                   |                                    |               |                |                | pl theor. | pl exper. | pl theor. | pl exper. |                                        |
| lactate dehydrogenase A                                    | NP_058721<br>P04642             | 1682 | 61      | 14                | 198,24                             | 51            | 36450,7        | 41583          | 8,45      | 9,05      |           |           | -2.29                                  |
|                                                            |                                 | 1785 | 351     | 20                | 356,85                             | 65            | 36450,7        | 37824          | 8,45      | 8,85      |           |           | -3.6                                   |
|                                                            |                                 | 1786 | 160     | 18                | 321,47                             | 63            | 36450,7        | 37824          | 8,45      | 9,15      |           |           | -3.72                                  |
|                                                            |                                 | 1794 | 167     | 19                | 333,91                             | 65            | 36450,7        | 37824          | 8,45      | 9,3       |           |           | -3.05                                  |
|                                                            |                                 | 1795 | 162     | 13                | 223,53                             | 40            | 36450,7        | 37824          | 8,45      | 8,6       |           |           | -3.59                                  |
|                                                            |                                 | 1799 | 128     | 16                | 276,72                             | 51            | 36450,7        | 37824          | 8,45      | 9         |           |           | -2.46                                  |
|                                                            |                                 | 1714 | 98      | 18                | 278,12                             | 63            | 36450,7        | 39020          | 8,45      | 8,95      |           |           | -3.51                                  |
| cofilin 1                                                  | NP_058843<br>P45592             | 2504 | 4       | 3                 | 39,6                               | 17            | 18532,6        | 18933          | 8,22      | 8,9       |           |           | -2.52                                  |
|                                                            |                                 | 2487 | 11      | 2                 | 39,75                              | 15            | 18532,6        | 17375          | 8,22      | 8,75      |           |           | -2.76                                  |
|                                                            |                                 | 2485 | 11      | 3                 | 58,15                              | 27            | 18532,6        | 18635          | 8,22      | 8,8       |           |           | -2.7                                   |
| cofilin 1                                                  | NP_058843<br>P45592             | 2538 | 42      | 7                 | 123,05                             | 42            | 18532,6        | 18108          | 8,22      | 8,95      |           |           | -2.36                                  |
|                                                            |                                 | 2519 | 69      | 10                | 188,49                             | 51            | 18532,6        | 16454          | 8,22      | 8,9       |           |           | -2.78                                  |
| proteasome (prosome, macropain) subunit, beta type, 9      | NP_036840<br>Q6MGA6             | 2447 | 15      | 3                 | 54,04                              | 14            | 23343,6        | 21321          | 4,89      | 4,3       |           |           | -2.48                                  |
|                                                            |                                 | 2438 | 14      | 3                 | 50,07                              | 16            | 23343,6        | 19832          | 4,89      | 4,3       |           |           | -2.12                                  |
| ornithine aminotransferase                                 | NP_071966<br>P04182             | 1255 | 63      | 12                | 195,86                             | 28            | 48332,9        | 51630          | 6,53      | 6,25      |           |           | -2.79                                  |
|                                                            |                                 | 1304 | 72      | 15                | 261,81                             | 43            | 48332,9        | 48894          | 6,53      | 6,5       |           |           | -2.23                                  |
| non-catalytic region of tyrosine kinase adaptor protein 1  | NP_001100321<br>B2RZ33          | 1255 | 37      | 11                | 176,31                             | 29            | 42876,7        | 51630          | 6,07      | 6,25      |           |           | -2.79                                  |
|                                                            |                                 | 1304 | 9       | 5                 | 80,29                              | 14            | 42876,7        | 48894          | 6,07      | 6,5       |           |           | -2.23                                  |
| adenylosuccinate synthetase, non muscle                    | NP_001099445<br>-               | 1255 | 10      | 6                 | 96,11                              | 14            | 50085,4        | 51630          | 5,98      | 6,25      |           |           | -2.79                                  |
|                                                            |                                 | 1304 | 4       | 4                 | 57,85                              | 12            | 50085,4        | 48894          | 5,98      | 6,5       |           |           | -2.23                                  |
| Aspartate aminotransferase, cytoplasmic (Transaminase A)   | NP_036703<br>P13221             | 1500 | 36      | 11                | 168,02                             | 29            | 46429          | 46303          | 6,73      | 7,5       |           |           | -3.65                                  |
|                                                            |                                 | 1425 | 56      | 14                | 239,8                              | 40            | 46429          | 46664          | 6,73      | 7,6       |           |           | -2.15                                  |
| voltage dependent anion channel (Vdac1)                    | NP_112643<br>Q9Z2L0             | 1922 | 12      | 4                 | 71,46                              | 15            | 32577,8        | 33921          | 8,3       | 8         |           |           | -3.57                                  |
|                                                            |                                 | 1866 | 9       | 4                 | 59,53                              | 17            | 32577,8        | 34722          | 8,3       | 8,05      |           |           | -3.07                                  |
| voltage-dependent anion channel 2                          | NP_112644<br>P81155             | 1922 | 7       | 4                 | 54,95                              | 14            | 31746          | 33921          | 7,44      | 8         |           |           | -3.57                                  |
|                                                            |                                 | 1925 | 12      | 5                 | 76,83                              | 21            | 31746          | 33921          | 7,44      | 8,1       |           |           | -2.62                                  |
|                                                            |                                 | 1753 | 18      | 6                 | 105,27                             | 24            | 31746          | 38120          | 7,44      | 7,6       |           |           | -2.16                                  |
| hypertrophic agonist responsive protein B64, isoform CRA_c | NP_001094010<br>Q711G3          | 2028 | 49      | 10                | 158,99                             | 48            | 28004,4        | 31139          | 5,64      | 5,25      |           |           | -2.65                                  |
|                                                            |                                 | 2089 | 15      | 5                 | 68,97                              | 18            | 28004,4        | 28586          | 5,64      | 5,7       |           |           | -2.84                                  |
| phosphoglycerate mutase type B subunit                     | NP_445742<br>P25113             | 2116 | 95      | 13                | 243,66                             | 63            | 28846,2        | 27926          | 7,07      | 7,15      |           |           | -3.51                                  |
|                                                            |                                 | 2119 | 207     | 15                | 295,67                             | 65            | 28846,2        | 27926          | 7,07      | 7,05      |           |           | -3.24                                  |
|                                                            |                                 | 2102 | 41      | 7                 | 126,74                             | 37            | 28846,2        | 28809          | 7,07      | 7,3       |           |           | -2.98                                  |
|                                                            |                                 | 2106 | 179     | 12                | 231,21                             | 52            | 28846,2        | 28364          | 7,07      | 7,25      |           |           | -2.73                                  |
| phosphomannomutase 2                                       | NP_001100443<br>B5DF46          | 2116 | 84      | 9                 | 153,72                             | 39            | 27708,9        | 27926          | 6,9       | 7,15      |           |           | -3.51                                  |
|                                                            |                                 | 2102 | 37      | 10                | 165,77                             | 44            | 27708,9        | 28809          | 6,9       | 7,3       |           |           | -2.98                                  |
| enoyl Coenzyme A hydratase, short chain, 1, mitochondrial  | NP_511178<br>P14604             | 2116 | 6       | 3                 | 53,88                              | 16            | 31516,6        | 27926          | 8,4       | 7,15      |           |           | -3.51                                  |
|                                                            |                                 | 2119 | 57      | 8                 | 144,85                             | 34            | 31516,6        | 27926          | 8,4       | 7,05      |           |           | -3.24                                  |
|                                                            |                                 | 2106 | 83      | 10                | 176,71                             | 38            | 31516,6        | 28364          | 8,4       | 7,25      |           |           | -2.73                                  |
| pyrroline-5-carboxylate reductase-like                     | NP_001011993<br>Q5PQJ6          | 2178 | 22      | 6                 | 108,36                             | 22            | 28878,7        | 26653          | 6,59      | 7,45      |           |           | -2.44                                  |
|                                                            |                                 | 2142 | 35      | 5                 | 89,21                              | 18            | 28878,7        | 27495          | 6,59      | 7,6       |           |           | -2.18                                  |
| Ppib protein                                               | NP_071981<br>P24368             | 2487 | 57      | 11                | 190,42                             | 46            | 23802,7        | 17375          | 9,5       | 8,75      |           |           | -2.76                                  |
|                                                            |                                 | 2485 | 32      | 9                 | 154,3                              | 43            | 23802,7        | 18635          | 9,5       | 8,8       |           |           | -2.7                                   |
| phosphoglycerate kinase 1                                  | NP_445743<br>P16617             | 1364 | 89      | 19                | 341,2                              | 57            | 44538,7        | 49276          | 8,02      | 7,25      |           |           | -2.35                                  |
|                                                            |                                 | 1366 | 75      | 16                | 281,76                             | 44            | 44538,7        | 49276          | 8,02      | 7,9       |           |           | -3.38                                  |
|                                                            |                                 | 1379 | 21      | 6                 | 111,69                             | 14            | 44538,7        | 48515          | 8,02      | 8,05      |           |           | -3.26                                  |
|                                                            |                                 | 1389 | 211     | 23                | 398,37                             | 58            | 44538,7        | 48894          | 8,02      | 8,5       |           |           | -4.47                                  |
|                                                            |                                 | 1390 | 201     | 22                | 361,81                             | 48            | 44538,7        | 48894          | 8,02      | 8,6       |           |           | -4.27                                  |
|                                                            |                                 | 1399 | 93      | 20                | 325,27                             | 43            | 44538,7        | 48894          | 8,02      | 8,75      |           |           | -5.66                                  |
|                                                            |                                 | 1400 | 106     | 20                | 344,16                             | 52            | 44538,7        | 48894          | 8,02      | 8,9       |           |           | -6.31                                  |
|                                                            |                                 | 1406 | 71      | 15                | 298,54                             | 45            | 44538,7        | 48894          | 8,02      | 9,2       |           |           | -3.26                                  |
|                                                            |                                 | 1409 | 119     | 22                | 400,43                             | 61            | 44538,7        | 48894          | 8,02      | 9,05      |           |           | -3.16                                  |
|                                                            |                                 | 1573 | 40      | 12                | 213,36                             | 32            | 44538,7        | 43172          | 8,02      | 5,7       |           |           | -3.05                                  |
|                                                            |                                 | 1285 | 370     | 29                | 522,86                             | 76            | 44538,7        | 49661          | 8,02      | 8,5       |           |           | -2.48                                  |
|                                                            |                                 | 1286 | 330     | 30                | 532,92                             | 79            | 44538,7        | 49661          | 8,02      | 8,6       |           |           | -2.75                                  |
|                                                            |                                 | 1290 | 26      | 10                | 146,36                             | 23            | 44538,7        | 49661          | 8,02      | 8,7       |           |           | -2.76                                  |
| aldolase A, isoform CRA_e                                  | NP_036627                       | 1474 | 76      | 14                | 239,73                             | 38            | 45086,5        | 47396          | 8,03      | 9,7       |           |           | -3.97                                  |

|                                                               |                        |      |           |           |           |           |         |       |      |       |       |
|---------------------------------------------------------------|------------------------|------|-----------|-----------|-----------|-----------|---------|-------|------|-------|-------|
| <b>P05065</b>                                                 | 1480                   | 63   | <b>9</b>  | 158,5     | <b>20</b> | 45086,5   | 47396   | 8,03  | 9,5  | -4,54 |       |
|                                                               | 1482                   | 102  | <b>15</b> | 278,53    | <b>41</b> | 45086,5   | 47396   | 8,03  | 8,75 | -3,34 |       |
|                                                               | 1483                   | 140  | <b>17</b> | 310,68    | <b>50</b> | 45086,5   | 47396   | 8,03  | 9,1  | -2,77 |       |
|                                                               | 1484                   | 103  | <b>12</b> | 222,09    | <b>36</b> | 45086,5   | 47396   | 8,03  | 9,4  | -4,43 |       |
|                                                               | 1489                   | 112  | <b>13</b> | 238,66    | <b>38</b> | 45086,5   | 47396   | 8,03  | 8,6  | -3,97 |       |
|                                                               | 1490                   | 35   | <b>12</b> | 213,56    | <b>34</b> | 45086,5   | 47396   | 8,03  | 8,9  | -4,57 |       |
|                                                               | 1286                   | 52   | <b>11</b> | 196,58    | <b>32</b> | 45086,5   | 49661   | 8,03  | 8,6  | -2,75 |       |
|                                                               | 1390                   | 66   | <b>10</b> | 172       | <b>26</b> | 45086,5   | 47396   | 8,03  | 8,8  | -2,05 |       |
| similar to Pol(yrC)-binding protein 1 (predicted)             | NP_001013241<br>Q6AYU5 | 1447 | 10        | <b>5</b>  | 77,88     | <b>22</b> | 35512,7 | 47396 | 7,03 | 7,1   | -3,03 |
|                                                               |                        | 1425 | 15        | <b>5</b>  | 80,5      | <b>20</b> | 35512,7 | 46664 | 7,03 | 7,6   | -2,15 |
| aldolase C                                                    | NP_036629<br>P09117    | 1500 | 8         | <b>4</b>  | 62,08     | <b>12</b> | 39284   | 46303 | 6,67 | 7,5   | -3,65 |
|                                                               |                        | 1425 | 82        | <b>13</b> | 241,73    | <b>40</b> | 39284   | 46664 | 6,67 | 7,6   | -2,15 |
| Malate dehydrogenase 1, NAD (soluble)                         | NP_150238<br>O88989    | 1761 | 85        | <b>10</b> | 169,62    | <b>28</b> | 36484,3 | 38717 | 5,92 | 6,15  | -2,41 |
|                                                               |                        | 1771 | 44        | <b>10</b> | 139,48    | <b>30</b> | 36484,3 | 36952 | 5,92 | 6,35  | -2,64 |
|                                                               |                        | 1806 | 54        | <b>6</b>  | 101,41    | <b>17</b> | 36484,3 | 35820 | 5,92 | 6,4   | -4,06 |
| guanine nucleotide binding protein, beta polypeptide 2-like 1 | NP_570090<br>P63245    | 1921 | 66        | <b>12</b> | 204,85    | <b>41</b> | 35095   | 34186 | 7,6  | 7,9   | -2,97 |
|                                                               |                        | 1922 | 104       | <b>14</b> | 241,83    | <b>51</b> | 35095   | 33921 | 7,6  | 8     | -3,57 |
|                                                               |                        | 1925 | 84        | <b>13</b> | 221,74    | <b>43</b> | 35095   | 33921 | 7,6  | 8,1   | -2,62 |
|                                                               |                        | 1866 | 81        | <b>13</b> | 233,8     | <b>48</b> | 35095   | 34722 | 7,6  | 8,05  | -3,07 |
|                                                               |                        | 1870 | 82        | <b>12</b> | 206,44    | <b>45</b> | 35095   | 34722 | 7,6  | 8     | -3,29 |
| triosephosphate isomerase 1                                   | NP_075211<br>P48500    | 2178 | 80        | <b>11</b> | 213,97    | <b>50</b> | 31011,7 | 26653 | 5,56 | 7,45  | -2,44 |
|                                                               |                        | 2142 | 70        | <b>13</b> | 239,12    | <b>55</b> | 31011,7 | 27495 | 5,56 | 7,6   | -2,18 |
| protease (prosome, macropain) 28 subunit, alpha               | NP_058960<br>Q6P9V7    | 2028 | 31        | <b>9</b>  | 144,51    | <b>37</b> | 28635,1 | 31139 | 5,63 | 5,25  | -2,65 |
|                                                               |                        | 2089 | 14        | <b>5</b>  | 62,13     | <b>20</b> | 28635,1 | 28586 | 5,63 | 5,7   | -2,84 |



## Fig. II: IPA analysis

Networks of interacting proteins were generated through Ingenuity Pathway analysis. Proteins identified (displayed as abbreviated gene names) were connected with interaction partners known from the literature and information stored in the Ingenuity Pathways Knowledge Base. Upregulated proteins are shown in red, downregulated in green. Solid lines represent direct interaction and dashed lines indirect interaction. Two networks generated from protein regulation in response to SM (**A**, **B**) and one network generated in response to HOCl-SM (**C**) are shown.

**A.** Network A contained 15 identified proteins (out of 34 molecules present in the network) identified proteins and involved top functions in Energy Production, Molecular Transport, and Nucleic Acid Metabolism (score = 44)

ADK, Adenosine kinase; ALDOC, Fructose-bisphosphate aldolase C (brain-type aldolase); APP, Amyloid beta A4 protein; CALU, Calumenin; CBS, Cystathionine beta-synthase; CNN3, Calponin-3; CTSD, Cathepsin D; DHFR, Dihydrofolate reductase; DPP7, Dipeptidyl-peptidase 2; ECHS1, Enoyl-CoA hydratase, mitochondrial; EIF4A1, Eukaryotic initiation factor 4A-I; ENO1, Alpha-enolase; ERBB2, Receptor tyrosine-protein kinase erbB-2; HNRNPA2B1, Heterogeneous nuclear ribonucleoproteins A2/B1; LAMP2, Lysosome-associated membrane glycoprotein 2; LAP3, Cytosol aminopeptidase; MDH1, Malate dehydrogenase, cytoplasmic; MDH2, Malate dehydrogenase, mitochondrial; MYC, N-myc proto-oncogene protein; P4HA1, Prolyl 4-hydroxylase subunit alpha-1; PCBP2, PCBP2 protein; PGAM1, Phosphoglycerate mutase 1; PRDX2, Peroxiredoxin-2; PURB, Transcriptional activator protein Pur-beta; RPL27, 60S ribosomal protein L27; SLC2A4, Solute carrier family 2, facilitated glucose transporter member 4 (Glucose transporter type 4, insulin-responsive); SP3, Transcription factor Sp3; TALDO1, Transaldolase; TNF, Tumor necrosis factor; TPD52, Tumor protein D52; TPD52L1, Tumor protein D53 (Tumor protein D52-like 1)

**B.** Network B contained 16 identified proteins (out of 35 molecules present in the network) and involved top functions in Small Molecule Biochemistry, Molecular Transport, and Free Radical Scavenging (score = 26)

ABCC9, ATP-binding cassette transporter sub-family C member 9 (Sulfonylurea receptor 2); ACP, Acid phosphatases; ALDH7A1, Alpha-aminoacidic semialdehyde dehydrogenase; Akt, RAC-alpha serine/threonine-protein kinase (AKT, protein kinase B); FSH, Follicle-stimulating hormone; GMFB, GMFB protein (Glia maturation factor, beta); GOT1, Aspartate aminotransferase, cytoplasmic; GST, Glutathione S-transferase; GSTA5, Glutathione S-transferase A5; GSTM1, Glutathione S-transferase Mu 1; GSTM2, Glutathione S-transferase Mu 2; GSTM3, Glutathione S-transferase Mu 3; GSTO1, Glutathione S-transferase omega-1; HYOU1, Hypoxia up-regulated protein 1; KCNJ11, ATP-sensitive inward rectifier potassium channel 11; LDHA, L-lactate dehydrogenase A chain; LDHB, L-lactate dehydrogenase B

chain; MGST1, Microsomal glutathione S-transferase 1; Ncoa-Nr112-Rxra, Nuclear receptor coactivator-Retinoic acid receptor RXR-alpha  
 NFkB, Nuclear factor NF-kappa-B complex; PA2G4, Proliferation-associated protein 2G4;  
 PGK2, Phosphoglycerate kinase 2; PKM2, Pyruvate kinase isozymes M1/M2; PRDX1, Peroxiredoxin-1  
 PRDX2, Peroxiredoxin-2; PRDX4, Peroxiredoxin-4; RPLP0, 60S acidic ribosomal protein P0;  
 RPLP2, 60S acidic ribosomal protein P2; SRXN1, Sulfiredoxin-1

**C.** Network C contained 21 identified proteins (out of 35 molecules present in the network)

and involved top functions in Carbohydrate Metabolism, Energy Production, and Molecular Transport (score = 48)

AK2, Adenylate kinase 2, mitochondrial; AK3, GTP:AMP phosphotransferase mitochondrial;  
 ALDOA, Fructose-bisphosphate aldolase A; ALDOC, Fructose-bisphosphate aldolase C;  
 ARF6, ADP-ribosylation factor 6; ATP6V1E1, V-type proton ATPase subunit E 1; CACYBP, Calcyclin-binding protein;  
 CFL1, Cofilin-1; DHRS2, Dehydrogenase/reductase member 2;  
 ECHS1, Enoyl-CoA hydratase, mitochondrial; GOT1, Aspartate aminotransferase, cytoplasmic;  
 GPD2, Glycerol-3-phosphate dehydrogenase, mitochondrial; HADH, 3-hydroxyacyl-CoA dehydrogenase type-2;  
 HGF, Hepatocyte growth factor; HK1, Hexokinase-1; HNRNPC, Heterogeneous nuclear ribonucleoproteins C1/C2; Ldh, L-lactate dehydrogenase;  
 LDHA, L-lactate dehydrogenase A chain  
 LDHB, L-lactate dehydrogenase B chain; LOC729708, PREDICTED: similar to Triosephosphate isomerase (TIM) (Triose-phosphate isomerase) isoform 1; MDH1, Malate dehydrogenase 1, mitochondrial;  
 NME3, Nucleoside diphosphate kinase 3; NME1, Nucleoside diphosphate kinase A  
 OAT, Ornithine aminotransferase; PGAM1, Phosphoglycerate mutase 1; PGK1, Phosphoglycerate kinase 1;  
 RPS25, 40S ribosomal protein S25; SF3A1, Splicing factor 3 subunit 1; SLC2A4, Solute carrier family 2, facilitated glucose transporter member 4 (Glucose transporter type 4, insulin-responsive);  
 TNF, Tumor necrosis factor; TOMM20, Mitochondrial import receptor subunit TOM20 homolog; VDAC1, Voltage-dependent anion-selective channel protein 1;  
 VDAC2, Voltage-dependent anion-selective channel protein 2

—: Binding; →: Acts on; —: Direct interaction; - - -: Indirect interaction; ▽: Kinase; ◁: Peptidase; ◇: Enzyme; □: Cytokine;  
 ▲: Transporter; ○: Transcriptional regulator; ⬡: Translational regulator; ●: Other

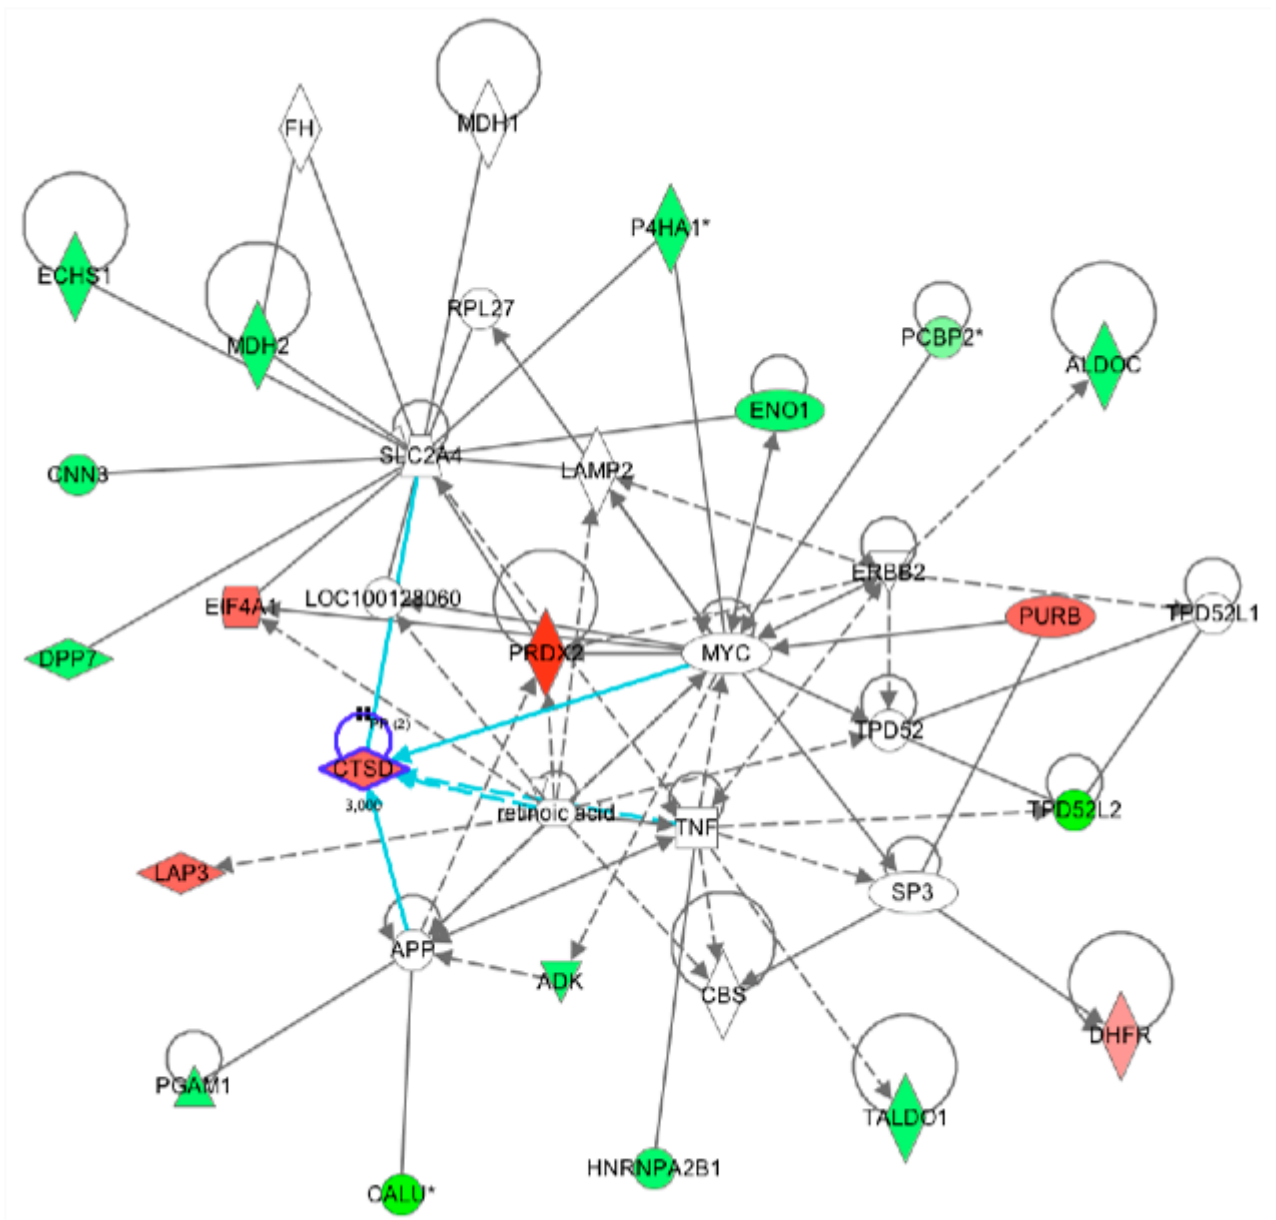

Suppl. Fig. IIA

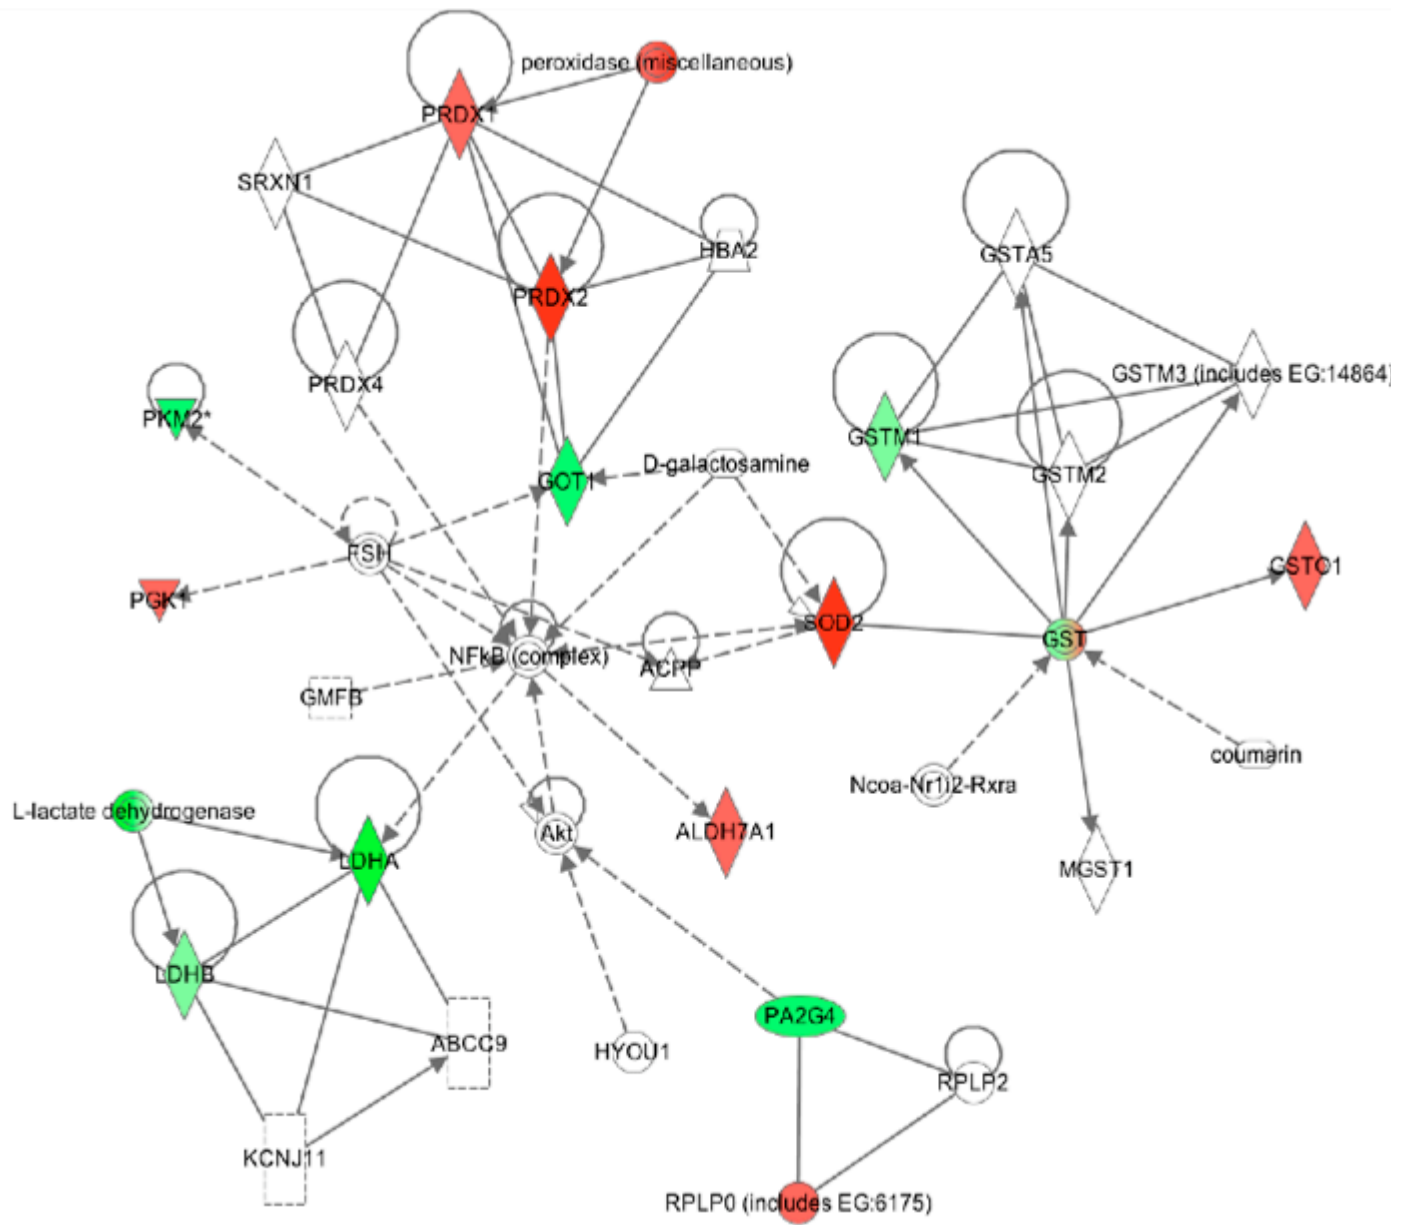

Suppl. Fig. IIB



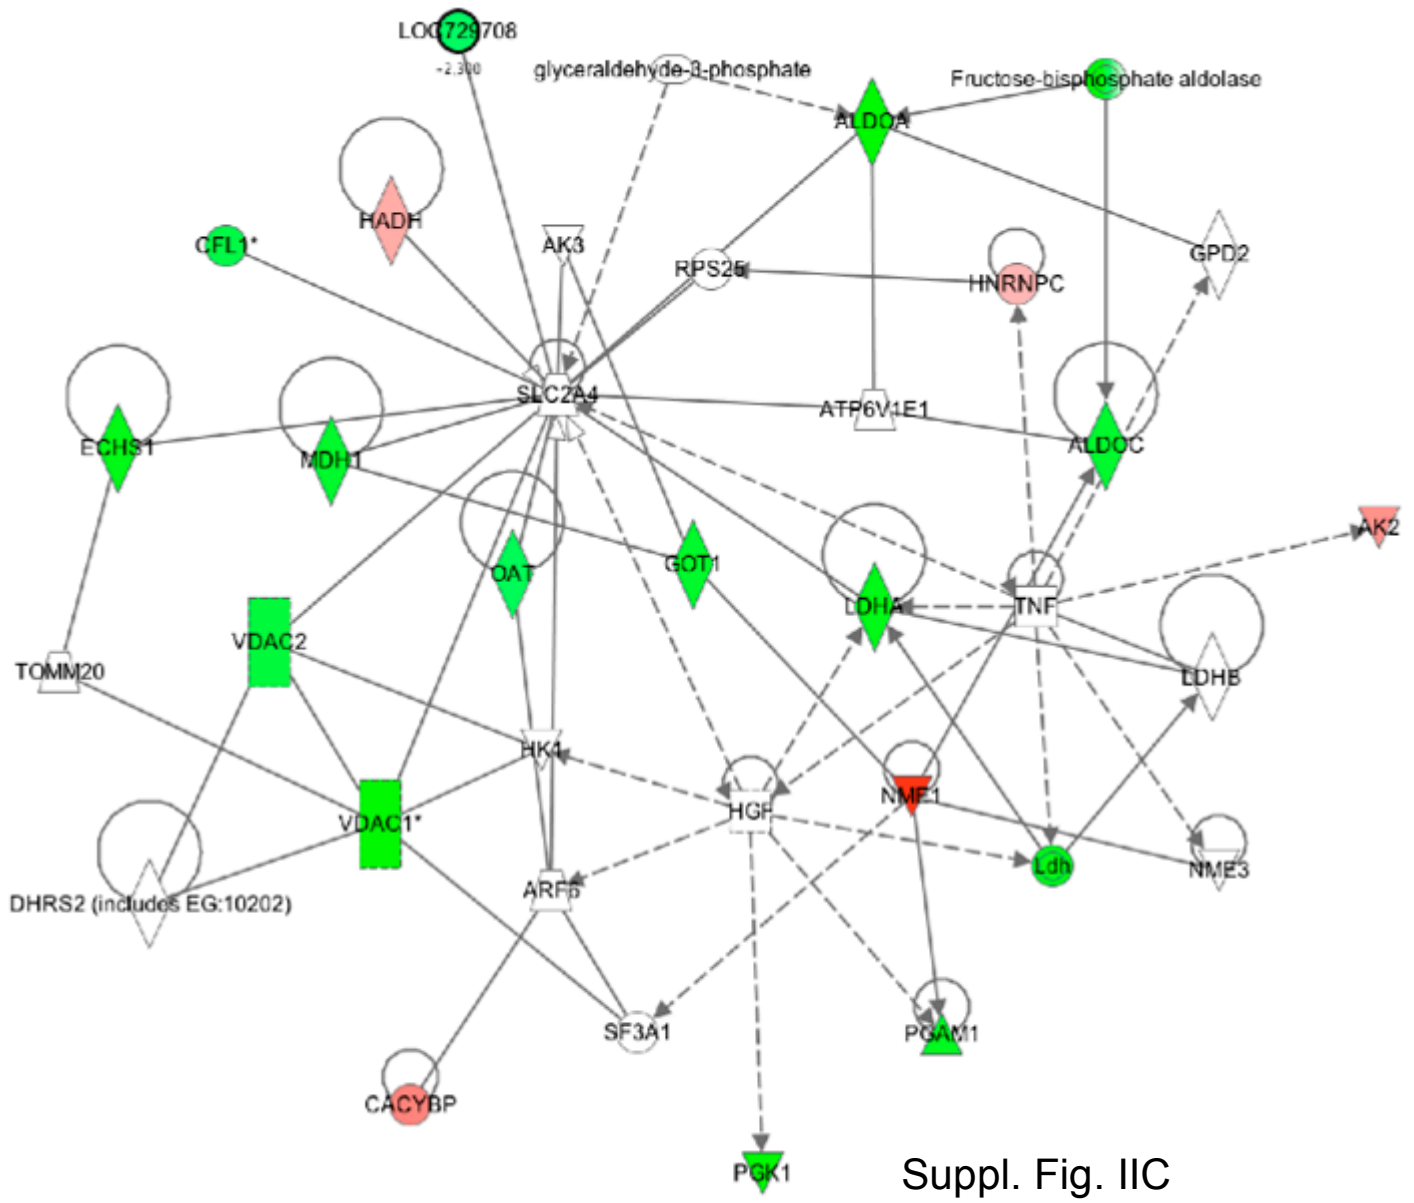

Supplement: NIHMS34537-supplement-Suppl_Nusshold_2010.pdf [file NIHMS34537-supplement-Suppl_Nusshold_2010.pdf]
